# Supplementary material for: Association between the Thigh Muscle and Insulin Resistance According to Body Mass Index in Middle-Aged Korean Adults
Source: PubMed Central journal article supplement — Diabetes Metab J. 2020 Apr 16;44(3):446–57. doi: 10.4093/dmj.2019.0110 (PMC7332329; doi:10.4093/dmj.2019.0110), 2020-04-16
Supplement: dmj-44-446-s001.pdf [file dmj-44-446-s001.pdf]

**Supplementary Table 1.** Characteristics of the study participants

| Variable                           | Men<br>(n=1,263)   | Women<br>(n=2,264) | P value | Premenopausal<br>women (n=788) | Postmenopausal<br>women (n=1,476) | P value |
|------------------------------------|--------------------|--------------------|---------|--------------------------------|-----------------------------------|---------|
| Age, yr                            | 49.8±10.3          | 52.2±8.6           | <0.001  | 43.0±7.0                       | 57.1±4.1                          | <0.001  |
| BMI, kg/m <sup>2</sup>             | 24.9±2.9           | 23.5±2.9           | <0.001  | 23.0±2.9                       | 23.7±2.8                          | <0.001  |
| Waist circumference, cm            | 86.8±7.8           | 78.2±7.9           | <0.001  | 76.3±7.5                       | 79.2±7.8                          | <0.001  |
| Visceral fat area, cm <sup>2</sup> | 117.1±47.9         | 89.4±38.6          | <0.001  | 72.7±31.7                      | 98.4±38.9                         | <0.001  |
| TMA, cm <sup>2</sup>               | 259.6±34.8         | 163.9±22.4         | <0.001  | 170.2±21.2                     | 160.5±22.2                        | <0.001  |
| TMA/Wt, cm <sup>2</sup> /kg        | 358.7±44.4         | 283.8±40.8         | <0.001  | 293.8±38.2                     | 278.4±41.2                        | <0.001  |
| SBP, mm Hg                         | 125.2±13.6         | 115.2±14.1         | <0.001  | 111.0±12.5                     | 117.5±14.5                        | <0.001  |
| DBP, mm Hg                         | 80.9±10.0          | 73.9±9.0           | <0.001  | 72.4±9.1                       | 74.7±8.9                          | <0.001  |
| Total cholesterol, mg/dL           | 197.9±34.0         | 201.9±34.9         | <0.001  | 191.9±32.3                     | 207.2±35.1                        | <0.001  |
| HDL-C, mg/dL                       | 51.3±12.4          | 61.0±14.3          | <0.001  | 62.2±14.5                      | 60.3±14.1                         | 0.003   |
| LDL-C, mg/dL                       | 122.4±31.9         | 120.9±31.8         | 0.194   | 113.3±29.6                     | 124.9±32.2                        | <0.001  |
| Triglycerides, mg/dL               | 130.0 (93.0–187.0) | 99.0 (74.0–134.5)  | <0.001  | 86.0 (65.0–112.0)              | 107.5 (81.0–144.0)                | <0.001  |
| Fasting glucose, mg/dL             | 90.0 (84.0–98.0)   | 87.0 (81.0–93.0)   | <0.001  | 85.0 (80.0–90.0)               | 88.0 (83.0–94.0)                  | <0.001  |
| Fasting insulin, uIU/mL            | 8.7 (6.6–11.4)     | 8.0 (6.4–10.1)     | <0.001  | 7.9 (6.5–9.9)                  | 8.0 (6.4–10.2)                    | 0.187   |
| HbA1c, %                           | 5.5 (5.3–5.8)      | 5.5 (5.3–5.8)      | 0.247   | 5.4 (5.2–5.6)                  | 5.6 (5.4–5.9)                     | <0.001  |
| HOMA-IR                            | 2.0 (1.5–2.7)      | 1.7 (1.3–2.3)      | <0.001  | 1.6 (1.3–2.1)                  | 1.8 (1.4–2.3)                     | <0.001  |
| Increased IR, %                    | 316 (25.0)         | 565 (25.0)         | 0.966   | 197 (25.0)                     | 369 (25.0)                        | 0.999   |
| C-reactive protein, mg/L           | 0.7 (0.4–1.3)      | 0.5 (0.3–1.1)      | <0.001  | 0.5 (0.3–1.0)                  | 0.6 (0.4–1.2)                     | <0.001  |
| Hypertension                       | 430 (34.1)         | 469 (20.7)         | <0.001  | 74 (9.4)                       | 395 (26.8)                        | <0.001  |
| Pre-diabetes mellitus              | 458 (36.3)         | 808 (35.7)         | 0.733   | 157 (20.0)                     | 651 (44.1)                        | <0.001  |
| Dyslipidemia                       | 609 (48.2)         | 826 (36.5)         | <0.001  | 144 (18.3)                     | 682 (46.2)                        | <0.001  |
| Antihypertensive medication        | 205 (16.2)         | 310 (13.7)         | 0.041   | 28 (3.6)                       | 282 (19.1)                        | <0.001  |
| Lipid-lowering medication          | 99 (7.8)           | 263 (11.6)         | <0.001  | 16 (2.0)                       | 247 (16.7)                        | <0.001  |
| Current smoker                     | 422 (33.4)         | 58 (2.6)           | <0.001  | 36 (4.6)                       | 22 (1.5)                          | <0.001  |
| Alcohol intake                     |                    |                    |         |                                |                                   | <0.001  |
| Non-drinker                        | 99 (7.8)           | 672 (29.7)         | <0.001  | 172 (21.8)                     | 500 (33.9)                        |         |
| Former drinker                     | 73 (5.8)           | 78 (3.4)           |         | 33 (4.2)                       | 45 (3.1)                          |         |
| Current non-heavy drinker          | 594 (47.0)         | 1,324 (58.5)       |         | 484 (61.4)                     | 840 (56.9)                        |         |
| Current heavy drinker              | 497 (39.4)         | 190 (8.4)          |         | 99 (12.6)                      | 91 (6.1)                          |         |
| Regular exercise                   | 832 (65.9)         | 1,488 (65.7)       | 0.928   | 475 (60.3)                     | 1,013 (68.6)                      | <0.001  |
| Sleep duration, hr/day             | 6.9±1.1            | 6.8±1.2            | 0.194   | 6.9±1.2                        | 6.8±1.2                           | 0.002   |

Values are presented as mean ± standard deviation, median (interquartile range), or number (%). P values were derived using the independent *t*-test, Wilcoxon rank sum test, or chi-square test.

BMI, body mass index; TMA, thigh muscle area; Wt, weight; SBP, systolic blood pressure; DBP, diastolic blood pressure; HDL-C, high-density lipoprotein cholesterol; LDL-C, low-density lipoprotein cholesterol; HbA1c, glycosylated hemoglobin; HOMA-IR, homeostasis model assessment of insulin resistance; IR, insulin resistance.
