# Supplementary material for: Association between the Thigh Muscle and Insulin Resistance According to Body Mass Index in Middle-Aged Korean Adults
Source: PubMed Central journal article supplement — Diabetes Metab J. 2020 Apr 16;44(3):446–57. doi: 10.4093/dmj.2019.0110 (PMC7332329; doi:10.4093/dmj.2019.0110), 2020-04-16
Supplement: dmj-44-446-s002.pdf [file dmj-44-446-s002.pdf]

**Supplementary Table 2.** Association between TMA/Wt and increased IR according to BMI categorization in premenopausal and postmenopausal women

| Subgroup                         | No. of participants | No. of cases (%) | OR (95% CI)      |                  |                  |
|----------------------------------|---------------------|------------------|------------------|------------------|------------------|
|                                  |                     |                  | Model 1          | Model 2          | Model 3          |
| Premenopausal women              |                     |                  |                  |                  |                  |
| BMI <25 kg/m <sup>2</sup>        |                     |                  |                  |                  |                  |
| Upper tertile                    | 209                 | 25 (12.0)        | 1.00             | 1.00             | 1.00             |
| Middle tertile                   | 210                 | 40 (19.1)        | 1.72 (1.00–2.95) | 1.70 (0.97–2.96) | 1.15 (0.64–2.09) |
| Lower tertile                    | 209                 | 46 (22.0)        | 2.04 (1.20–3.48) | 1.94 (1.11–3.37) | 1.15 (0.64–2.10) |
| Per 10 cm <sup>2</sup> /kg lower | 628                 | 111 (17.7)       | 1.09 (1.02–1.15) | 1.08 (1.02–1.15) | 1.01 (0.95–1.08) |
| BMI ≥25 kg/m <sup>2</sup>        |                     |                  |                  |                  |                  |
| Upper tertile                    | 53                  | 33 (62.3)        | 1.00             | 1.00             | 1.00             |
| Middle tertile                   | 54                  | 25 (46.3)        | 0.50 (0.23–1.09) | 0.47 (0.20–1.12) | 0.41 (0.15–1.07) |
| Lower tertile                    | 53                  | 28 (52.8)        | 0.56 (0.25–1.26) | 0.49 (0.21–1.09) | 0.45 (0.16–1.23) |
| Per 10 cm <sup>2</sup> /kg lower | 160                 | 86 (53.8)        | 0.96 (0.86–1.04) | 0.94 (0.85–1.05) | 0.94 (0.83–1.07) |
| Postmenopausal women             |                     |                  |                  |                  |                  |
| BMI <25 kg/m <sup>2</sup>        |                     |                  |                  |                  |                  |
| Upper tertile                    | 349                 | 53 (15.2)        | 1.00             | 1.00             | 1.00             |
| Middle tertile                   | 349                 | 50 (14.3)        | 0.92 (0.60–1.40) | 0.90 (0.58–1.39) | 0.66 (0.42–1.04) |
| Lower tertile                    | 349                 | 69 (19.8)        | 1.34 (0.91–1.99) | 1.26 (0.84–1.91) | 0.78 (0.50–1.22) |
| Per 10 cm <sup>2</sup> /kg lower | 1,047               | 172 (16.4)       | 1.01 (0.97–1.05) | 1.01 (0.97–1.06) | 0.96 (0.91–1.01) |
| BMI ≥25 kg/m <sup>2</sup>        |                     |                  |                  |                  |                  |
| Upper tertile                    | 143                 | 60 (42.0)        | 1.00             | 1.00             | 1.00             |
| Middle tertile                   | 143                 | 74 (51.8)        | 1.48 (0.93–2.36) | 1.53 (0.94–2.50) | 1.24 (0.72–2.13) |
| Lower tertile                    | 143                 | 63 (44.1)        | 1.07 (0.67–1.72) | 1.11 (0.68–1.82) | 0.64 (0.37–1.14) |
| Per 10 cm <sup>2</sup> /kg lower | 429                 | 197 (45.9)       | 1.04 (0.98–1.09) | 1.02 (0.78–1.08) | 0.96 (0.90–1.02) |

Model 1, adjusted for age; Model 2, adjusted for variables in Model 1 plus systolic blood pressure, triglyceride level, smoking, alcohol intake, regular exercise, and sleep duration; Model 3, adjusted for variables in Model 2 plus visceral fat.

TMA, thigh muscle area; Wt, weight; IR, insulin resistance; BMI, body mass index; OR, odds ratio; CI, confidence interval.
