# Supplementary material for: Association between the Thigh Muscle and Insulin Resistance According to Body Mass Index in Middle-Aged Korean Adults
Source: PubMed Central journal article supplement — Diabetes Metab J. 2020 Apr 16;44(3):446–57. doi: 10.4093/dmj.2019.0110 (PMC7332329; doi:10.4093/dmj.2019.0110), 2020-04-16
Supplement: dmj-44-446-s003.pdf [file dmj-44-446-s003.pdf]

**Supplementary Table 3.** Determinants of increased IR in premenopausal and postmenopausal women

| Subgroup                                      | OR (95% CI)      |
|-----------------------------------------------|------------------|
| Premenopausal women                           |                  |
| TMA/Wt                                        |                  |
| Middle tertile (vs. upper tertile)            | 1.15 (0.70–1.88) |
| Lower tertile (vs. upper tertile)             | 1.00 (0.58–1.60) |
| Age, 1 SD increase                            | 1.17 (1.01–1.58) |
| Systolic blood pressure, 1 SD increase        | 1.06 (0.86–1.31) |
| Triglyceride, 1 SD increase                   | 1.19 (0.98–1.45) |
| Current smoker (vs. non-smoker)               | 1.03 (0.45–2.32) |
| Current heavy drinker (vs. non-drinker)       | 1.62 (0.68–3.59) |
| Regular exerciser (vs. non-regular exerciser) | 0.98 (0.67–1.44) |
| Sleep duration, 1 SD increase                 | 1.06 (0.88–1.28) |
| Visceral fat area, 1 SD increase              | 2.12 (1.62–3.19) |
| Postmenopausal women                          |                  |
| TMA/Wt                                        |                  |
| Middle tertile (vs. upper tertile)            | 0.76 (0.54–1.08) |
| Lower tertile (vs. upper tertile)             | 0.77 (0.54–1.10) |
| Age, 1 SD increase                            | 0.94 (0.82–1.09) |
| Systolic blood pressure, 1 SD increase        | 1.18 (1.03–1.35) |
| Triglyceride, 1 SD increase                   | 1.26 (1.11–1.44) |
| Current smoker (vs. non-smoker)               | 1.24 (0.38–4.12) |
| Current heavy drinker (vs. non-drinker)       | 2.29 (1.07–4.93) |
| Regular exerciser (vs. non-regular exerciser) | 0.91 (0.68–1.21) |
| Sleep duration, 1 SD increase                 | 0.99 (0.87–1.14) |
| Visceral fat area, 1 SD increase              | 3.68 (2.76–4.72) |

IR, insulin resistance; OR, odds ratio; CI, confidence interval; TMA, thigh muscle area; Wt, weight; SD, standard deviation.
